# Supplementary material for: Health Utility of Facial Angiofibroma associated with Tuberous Sclerosis Complex
Source: Research Square preprint supplement (doi:10.21203/rs.3.rs-8783043/v1), 2026-02-17
Supplement: Supplementary file 1 [file 18312cbe5d633ba71e13ed23.docx]

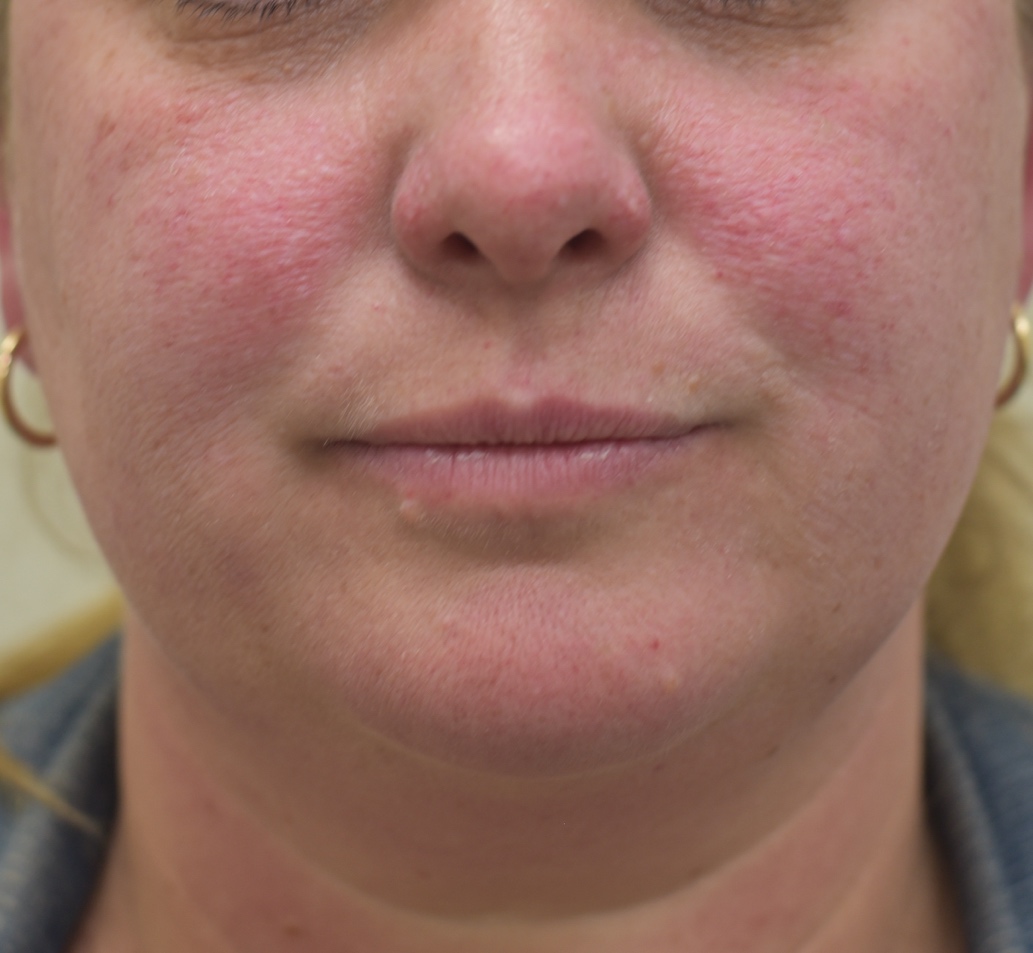


*Figure S1: Almost-clear TSC-associated FA health state*

*
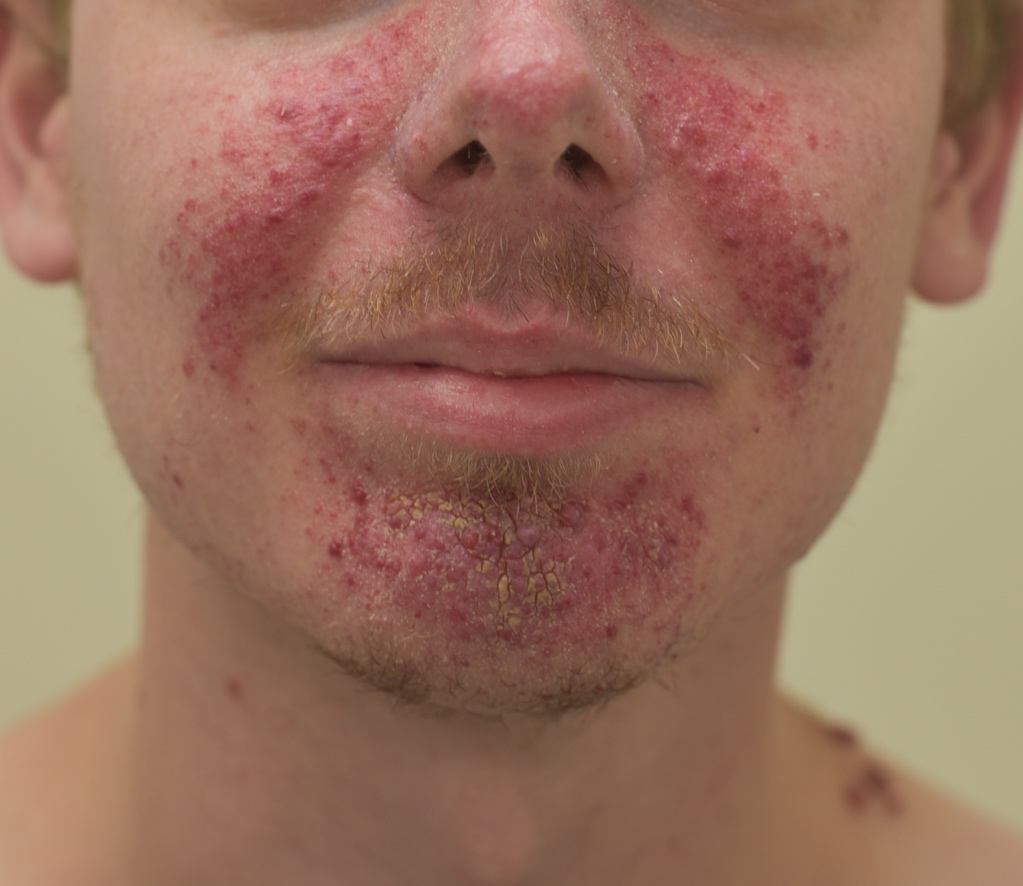
*

Figure S2: Moderate TSC-associated FA health state
